# Supplementary material for: MiR-26a-5p enhances cells proliferation, invasion, and apoptosis resistance of fibroblast-like synoviocytes in rheumatoid arthritis by regulating PTEN/PI3K/AKT pathway
Source: Oxford University Press journal article supplement (doi:10.1042/bsr20182192), 2019-06-20
Supplement: bsr-2018-2192_supp.pdf [file bsr-2018-2192_supp.pdf]

Supplementary Table 1. Demographic and clinical data of included participants

| Groups | Name     | Gender | Age (Y) | Disease Duration | Position   | Date      |
|--------|----------|--------|---------|------------------|------------|-----------|
| RA     | XB Xiao  | Male   | 45      | 13 years         | Right Knee | 2018.3.30 |
| RA     | ZK Yang  | Male   | 61      | 16 years         | Right Knee | 2018.4.3  |
| RA     | YS He    | Female | 77      | 15 years         | Right Knee | 2018.4.22 |
| RA     | Sy Chen  | Male   | 60      | 23 years         | Right Knee | 2018.5.14 |
| RA     | Hh Lv    | Female | 53      | 21 years         | Left Knee  | 2018.5.14 |
| RA     | RH Lin   | Female | 63      | 17 years         | Left Knee  | 2018.4.3  |
| RA     | YW Zheng | Female | 51      | 11 years         | Right Knee | 2018.6.1  |
| RA     | QX Li    | Female | 50      | 16 years         | Left Knee  | 2018.6.6  |
| Trauma | GH Huang | Male   | 43      | 10 days          | Right Knee | 2018.4.5  |
| Trauma | YX Zhang | Female | 35      | 7 days           | Right Knee | 2018.4.11 |
| Trauma | HQ W     | Female | 55      | 1 days           | Right Knee | 2018.4.15 |
| Trauma | GH Sheng | Male   | 88      | 1 days           | Left Knee  | 2018.4.19 |
| Trauma | ZY Li    | Female | 47      | 1 days           | Left Knee  | 2018.4.22 |
| Trauma | XL Li    | Male   | 29      | 1 days           | Left Knee  | 2018.5.4  |
| Trauma | JL Wu    | Female | 56      | 32 days          | Left Knee  | 2018.5.13 |
| Trauma | SH Wu    | Male   | 55      | 2 days           | Right Knee | 2018.5.16 |
| Trauma | GY Liang | Male   | 72      | 20 days          | Left Knee  | 2018.5.21 |
| OA     | JY Lai   | Female | 47      | 13 years         | Right Knee | 2018.3.28 |
| OA     | HC Cai   | Male   | 52      | 21 years         | Right Knee | 2018.4.7  |
| OA     | JW Huang | Female | 61      | 15 years         | Left Knee  | 2018.4.7  |
| OA     | Y Wang   | Female | 71      | 33 years         | Left Knee  | 2018.4.18 |
| OA     | YH Mo    | Female | 56      | 12 years         | Right Knee | 2018.5.7  |
| OA     | XQ Chen  | Female | 61      | 30 years         | Left Knee  | 2018.5.12 |
| OA     | HH Hong  | Male   | 55      | 10 years         | Right Knee | 2018.5.12 |
| OA     | ZK Liu   | Female | 68      | 32 years         | Left Knee  | 2018.5.25 |
